# Supplementary material for: γ-Oryzanol alleviates acetaminophen-induced liver injury: roles of modulating AMPK/GSK3β/Nrf2 and NF-κB signaling pathways
Source: Royal Society of Chemistry journal article supplement (doi:10.1039/c9fo01808e), 2019-01-01
Supplement: c9fo01808e1.pdf [file c9fo01808e1.pdf]

**Table 1 List of primer sequences for RT-PCR**

|       | Gene           | Forward sequence (5' to 3') | Reverse sequence (5' to 3') |
|-------|----------------|-----------------------------|-----------------------------|
| Human | GAPDH          | CTGCACCACCAACTGCTTAG        | AGGTCCACCACTGACACGTT        |
|       | HO-1           | CAACAAAGTGCAAGATTCTG        | TGCATTCACATGGCATAAAG        |
|       | NQO1           | AGTATCCACAATAGCTGACG        | TTTGTGGGTCTGTAGAAATG        |
|       | GCLC           | GAAGAAGATATTTTCCTGTCATTGA   | CCATTCATGTATTGAAGAGTGAATT   |
|       | GCLM           | ATCAAACCTCTTCATCATCAAC      | GATTAACCTCCATCTTCAATAGG     |
| Mouse | $\beta$ -Actin | TGGAATCCTGTGGCATCCATGAAA    | TAAAACGCAGCTCAGTAACAGTCCG   |
|       | HO-1           | GAGATAGAGCGCAACAAGCAG       | CTTGACCTCAGGTGTCATCTC       |
|       | NQO1           | GGTTTACAGCATTGGCCACACT      | AACAGGCTGCTTGGAGCAAA        |
|       | GCLC           | GTCTTCAGGTGACATTCCAAGC      | TGTTCTTCAGGGGCTCCAGTC       |
|       | GCLM           | CTGCTAAACTGTTCATTGTAGG      | CTATTGGGTTTTACCTGTG         |
